# Supplementary material for: Experimental and theoretical study of the reaction of the ethynyl radical with nitrous oxide, C2H + N2O
Source: Royal Society of Chemistry journal article supplement (doi:10.1039/c2cp40367f), 2012-01-01
Supplement: c2cp40367f.pdf [file c2cp40367f.pdf]

## Theoretical and Experimental Study of the Reaction of Ethynyl Radical with Nitrous Oxide ( $C_2H + N_2O$ )

Vinh Son Nguyen,<sup>a)</sup> Rehab Ibrahim M. Elsamra,  
Jozef Peeters, Minh Tho Nguyen,\* Shaun A. Carl,\*

*Department of Chemistry, University of Leuven, Celestijnenlaan 200F, B-3001 Leuven, Belgium*

---

<sup>a)</sup> On leave from the Faculty of Chemistry, Hanoi National University of Education, Hanoi, Vietnam.

<sup>\*</sup>) Email: [minh.nguyen@chem.kuleuven.be](mailto:minh.nguyen@chem.kuleuven.be), [shaun.carl@chem.kuleuven.be](mailto:shaun.carl@chem.kuleuven.be)

**Supporting Information Available.** **Figures S-1** shows the geometrical parameters of all 20 adducts and complexes optimized at the UB3LYP/6-31(d). **Figure S-2** displays geometrical parameters of all related TSs at the UB3LYP/6-31(d).

**Figure S-1.**

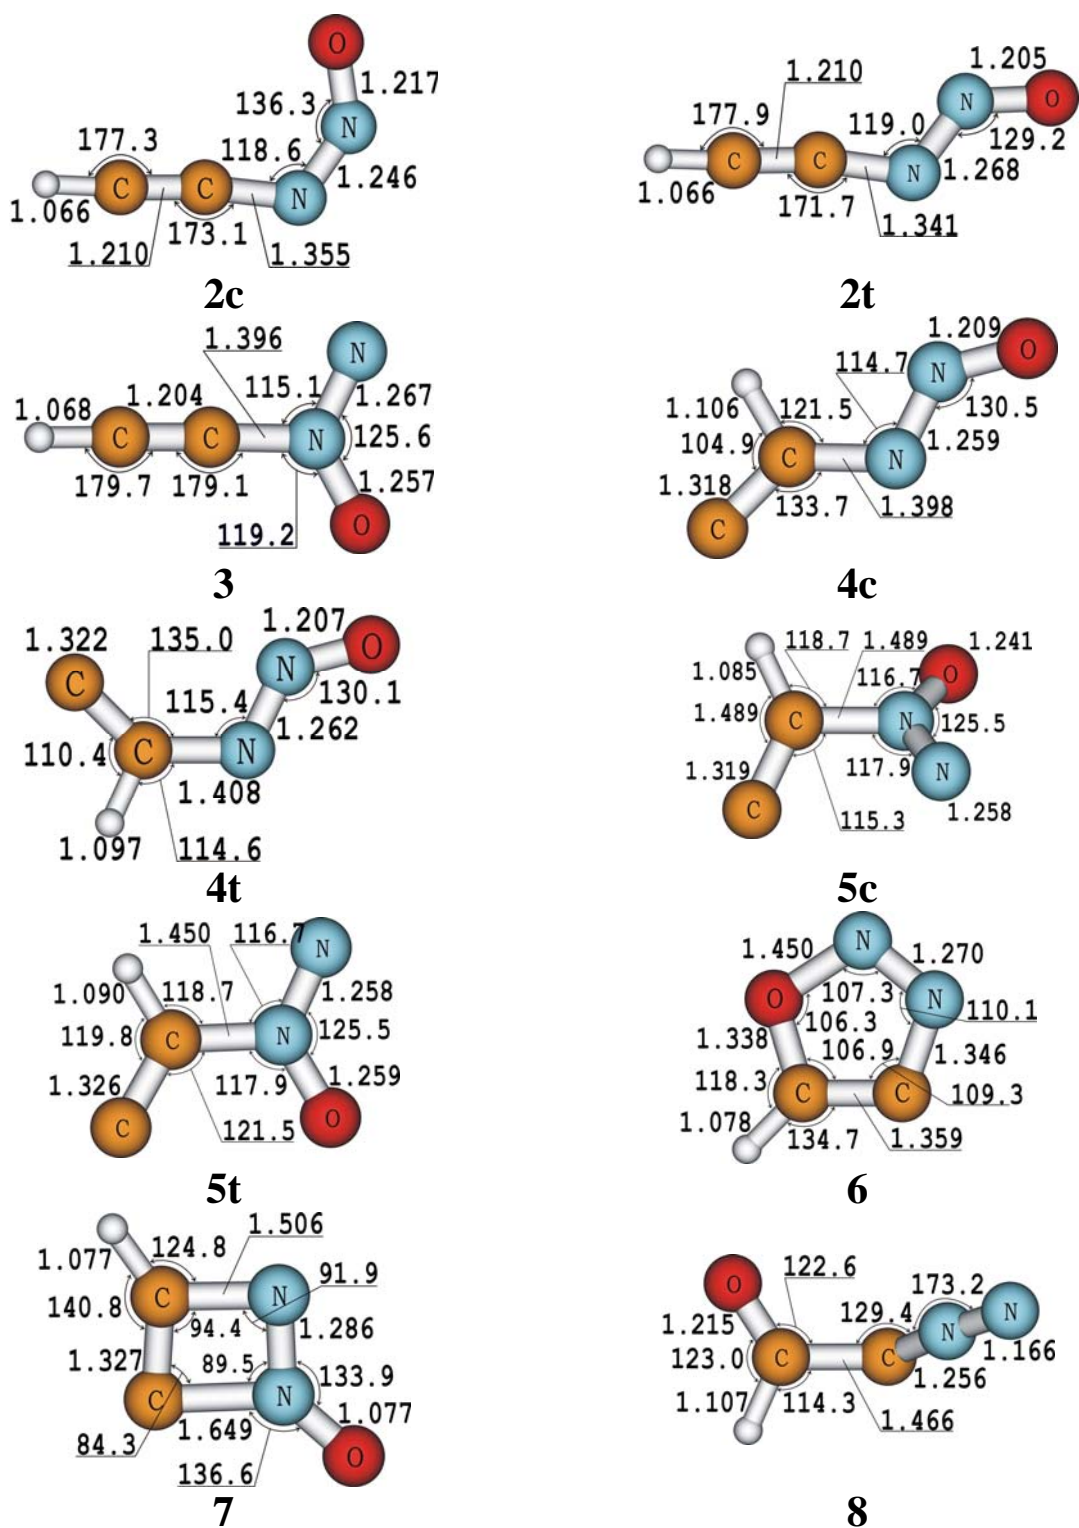

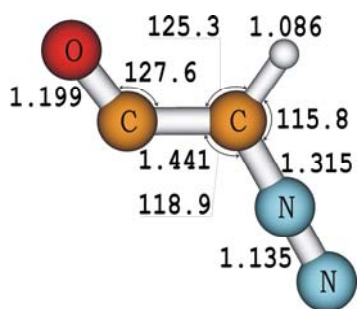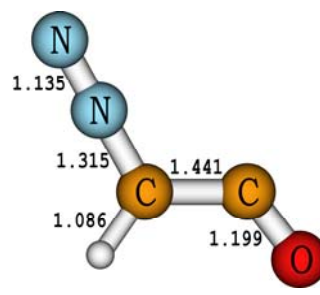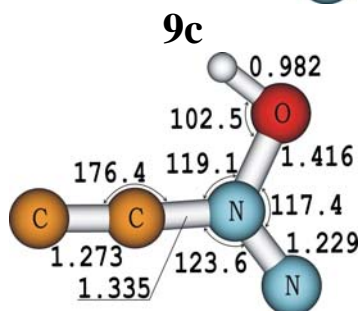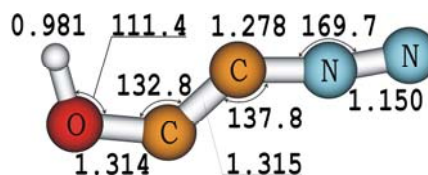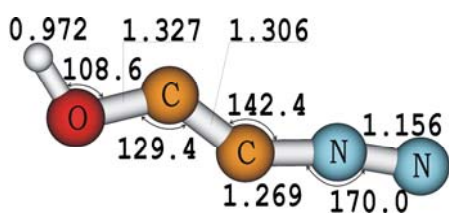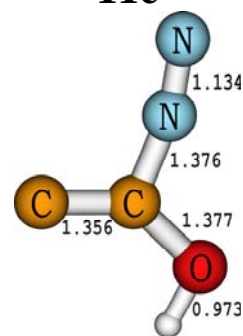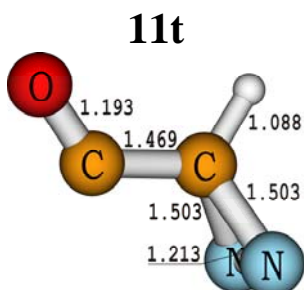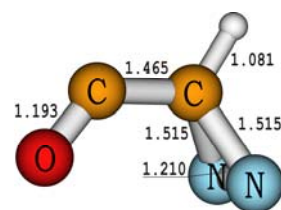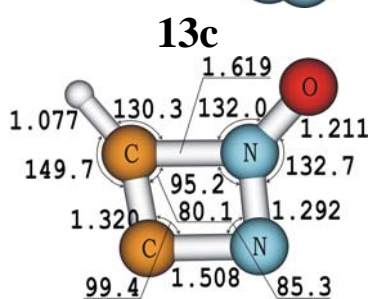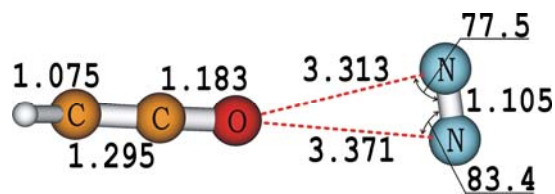

**Figure S-2.**

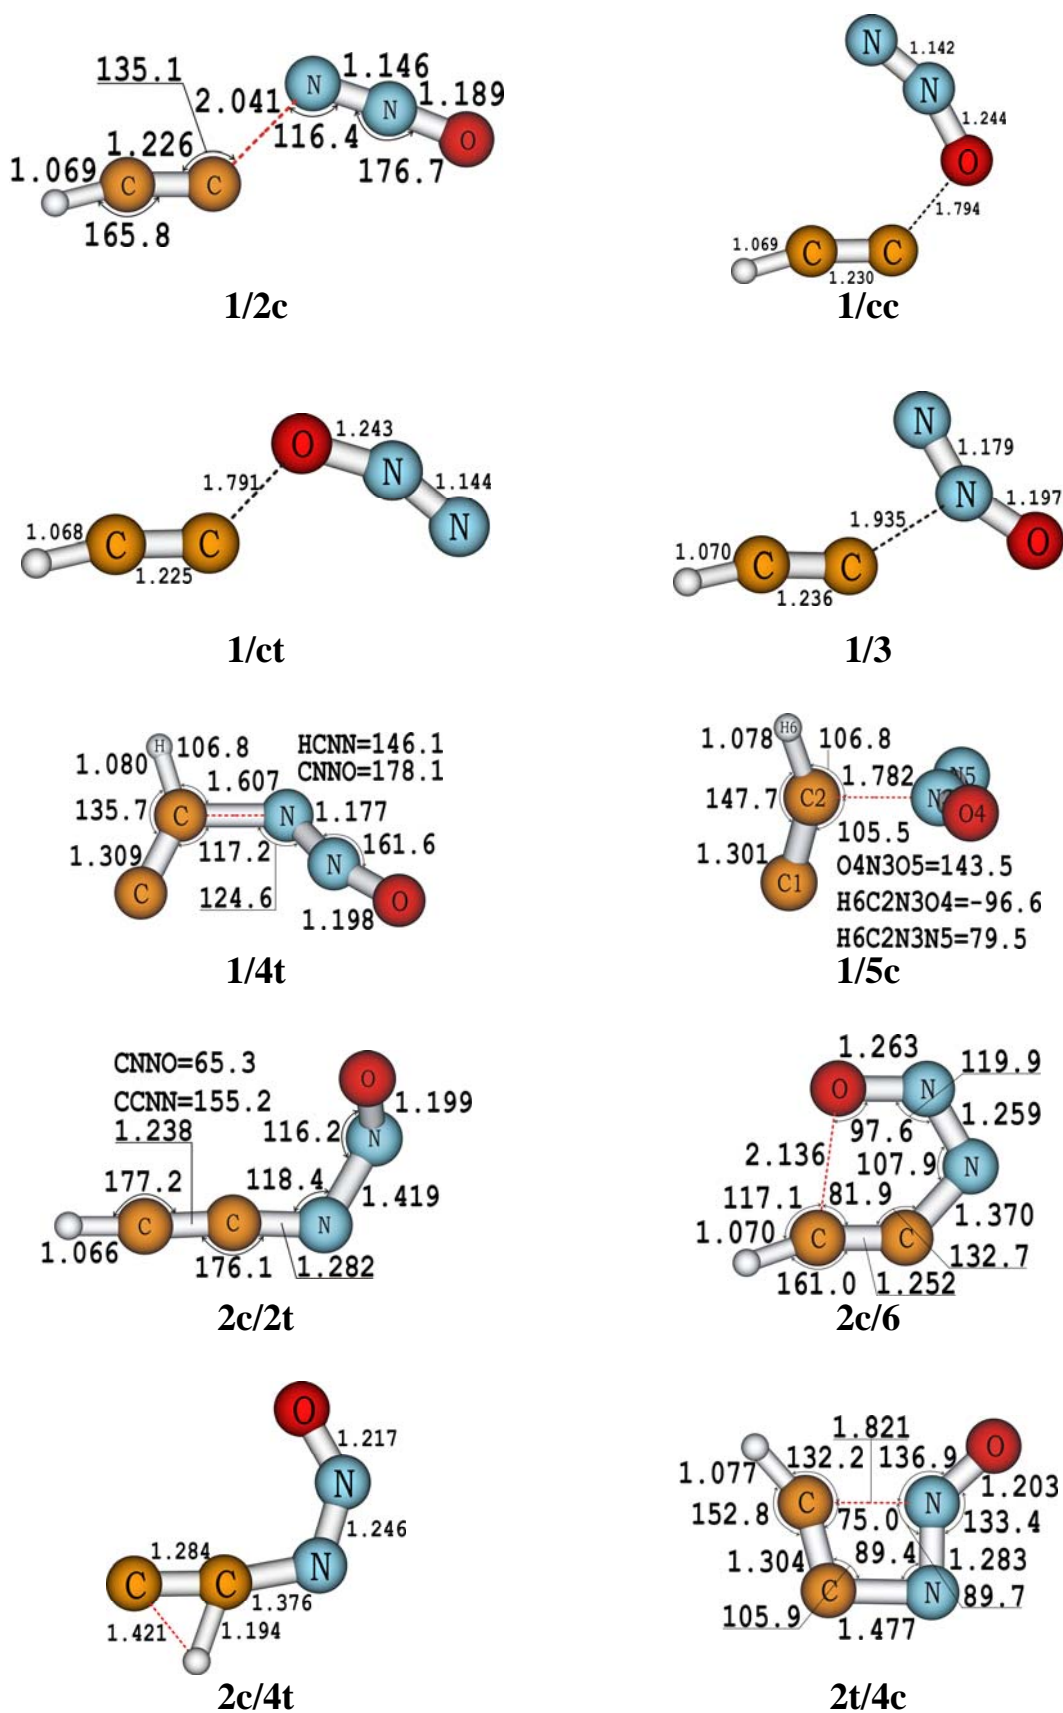

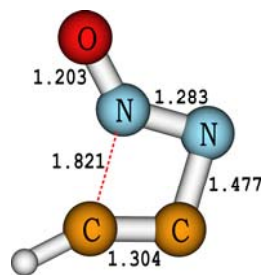

**2t/14**

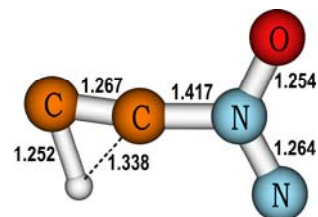

**3/5t**

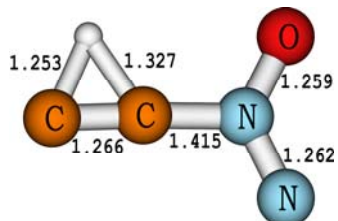

**3/5c**

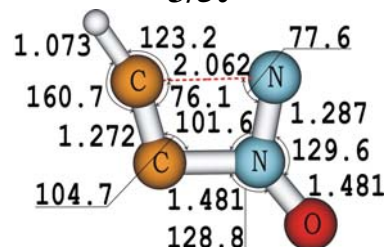

**3/7**

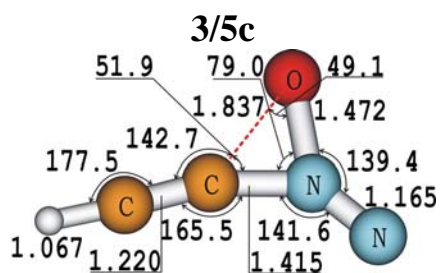

**3/P1**

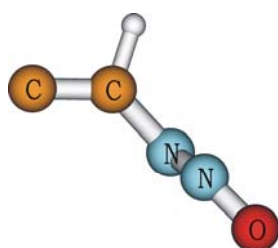

**4c/4t**

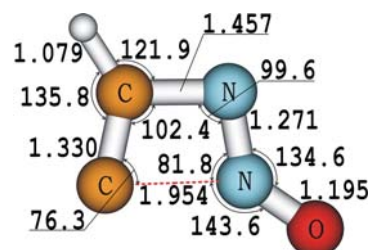

**4t/7**

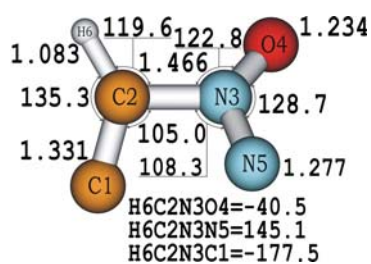

**5c/14**

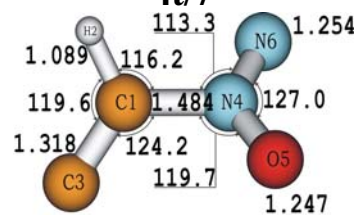

**5c/5t**

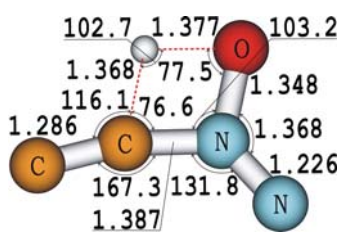

**5/10**

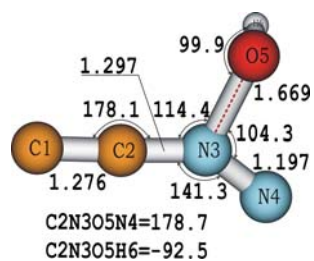

**10/P5**



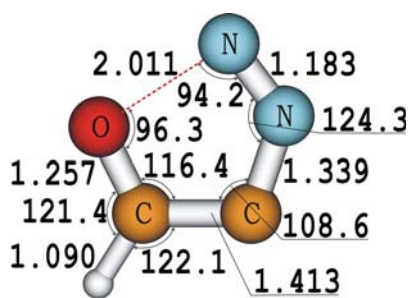

**6/8**

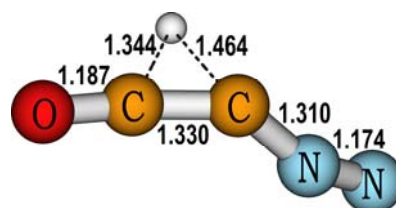

**8/9c**

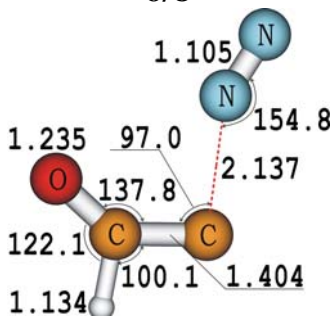

**8/P1'**

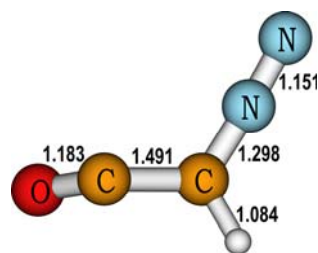

**9c/9t**

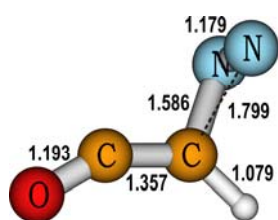

**9c/13c**

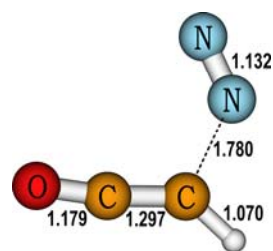

**9c/P1**

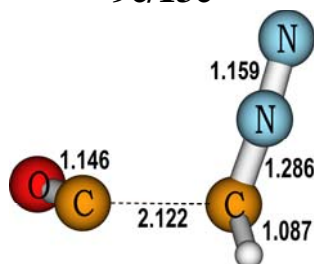

**9c/P2**

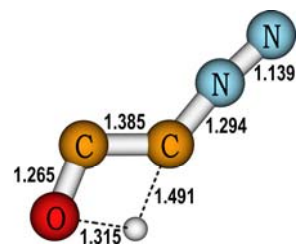

**9t/11c**

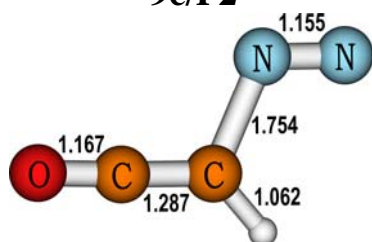

**9t/P1**

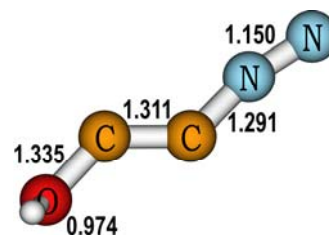

**11c/11t**

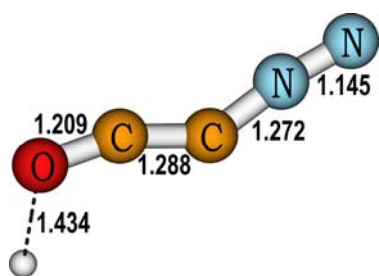

**11c/P4**

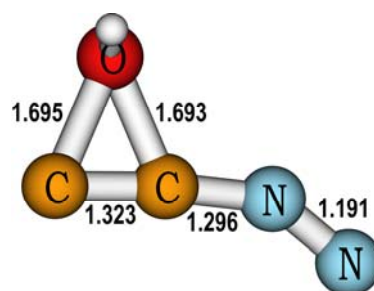

**11t/12**

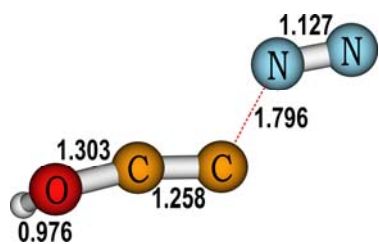

**11t/P3**

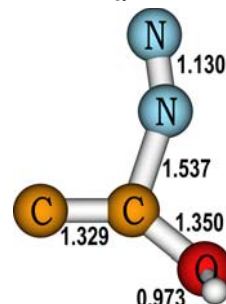

**12/P3**

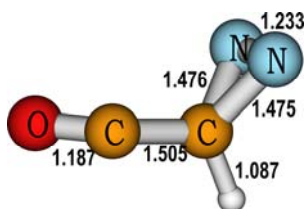

**13c/13t**

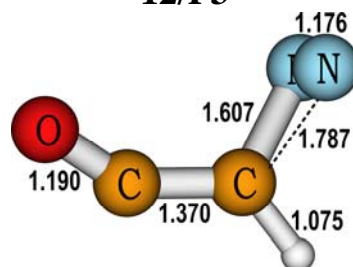

**13c/P1**

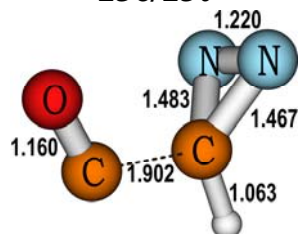

**13c/P2**

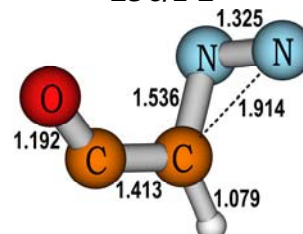

**13t/P1**
